# Supplementary material for: Oil & gas produced water retention ponds as potential passive treatment for radium removal and beneficial reuse
Source: Royal Society of Chemistry journal article supplement (doi:10.1039/d0em00413h), 2021-01-01
Supplement: d0em00413h2.pdf [file d0em00413h2.pdf]

Table S2. Field measurements, major anions and cations and grab sediment Ra-226, Ra-228 and Total Ra reported as Bq/kg. All anion and cation concentrations are reported as mg/L.

| Site Name | Temperature (°C) | DO (mg/L) | pH   | EC (uS/cm) | Cl   | SO <sub>4</sub> | Br  | NO <sub>3</sub> | PO <sub>4</sub> | Sr   | Mn   | K   | Mg  | Ca  | Ba   | B    | Na   | Li   | <sup>226</sup> Ra ± error (Bq/kg) | <sup>228</sup> Ra ± error (Bq/kg) | Total Ra ± error (Bq/kg) |
|-----------|------------------|-----------|------|------------|------|-----------------|-----|-----------------|-----------------|------|------|-----|-----|-----|------|------|------|------|-----------------------------------|-----------------------------------|--------------------------|
| CSW       | 4.85             | 1.56      | 8.80 | 900        | 6    | 318             |     | 0.14            | 0.08            | 4.3  | -    | 3   | 41  | 44  | 0.02 | 0.08 | 81   | 0.08 | 44.4 ± 0.6                        | 45.2 ± 2.0                        | 89.6 ± 4.2               |
| DA-D      | 35.43            | 0.42      | 7.07 | 6404       | 672  | 1868            | 1.0 | 0.13            | 0.11            | 3.2  | -    | 80  | 71  | 304 | 0.04 | 3.09 | 780  | 1.46 | 1013.3 ± 3.5                      | 739.9 ± 10.0                      | 1753.2 ± 24.4            |
| DA-DSW1   | 3.62             | 2.28      | 8.05 | 6325       | 631  | 1795            | 1.0 | 0.15            | -               | 3.7  | -    | 95  | 90  | 314 | -    | 4.17 | 1018 | 1.68 | 520.7 ± 5.4                       | 271.8 ± 13.0                      | 792.5 ± 38.7             |
| DA-DSW2   | 2.37             | 3.48      | 8.56 | 11410      | 1531 | 4279            | 2.3 | 0.18            | 0.13            | 5.7  | -    | 172 | 168 | 363 | -    | 7.92 | 2252 | 3.02 | 229.2 ± 1.3                       | 213.3 ± 4.1                       | 442.6 ± 8.8              |
| DA-W1     | 1.96             | 1.67      | 8.41 | 5788       | 660  | 1865            | 0.9 | 0.31            | -               | 3.4  | -    | 90  | 77  | 275 | -    | 3.33 | 890  | 1.52 | 1518.0 ± 7.2                      | 1202.8 ± 21.2                     | 2720.8 ± 49.6            |
| DA-W2     | 2.11             | 3.70      | 8.30 | 7829       | 1038 | 2711            | 1.4 | 0.22            | 0.12            | 6.2  | -    | 109 | 102 | 286 | -    | 4.63 | 1303 | 1.89 | 233.5 ± 2.4                       | 135.5 ± 6.5                       | 369.1 ± 18.1             |
| DB-100m   | 6.62             | 1.50      | 8.10 | 4719       | 391  | 1749            | 0.6 | 0.11            | 0.07            | 6.7  | -    | 110 | 93  | 315 | 0.04 | 2.78 | 569  | 1.61 | 2724.1 ± 9.1                      | 1565.3 ± 24.4                     | 4289.4 ± 68.4            |
| DB-D      | 10.55            | 1.18      | 7.40 | 5084       | 437  | 2068            | 0.7 | 0.15            | 0.12            | 4.6  | -    | 117 | 94  | 340 | 0.05 | 2.82 | 604  | 1.80 | 1375.0 ± 9.0                      | 681.7 ± 21.5                      | 2056.7 ± 66.2            |
| DB-DSW1   | 1.87             | 4.49      | 7.77 | 6431       | 544  | 2343            | 0.9 | 0.10            | 0.08            | 10.5 | 0.03 | 153 | 139 | 426 | 0.04 | 3.56 | 845  | 2.12 | 333.0 ± 2.2                       | 131.6 ± 5.0                       | 464.6 ± 18.0             |
| DB-W1     | 1.02             | 3.18      | 7.62 | 6420       | 600  | 2600            | 1.0 | 0.14            | 0.07            | 9.0  | -    | 153 | 137 | 421 | 0.03 | 3.66 | 852  | 2.16 | 724.7 ± 4.9                       | 162.0 ± 8.3                       | 886.7 ± 45.8             |
| DC-100m   | 41.10            | 0.61      | 8.11 | 2291       | 176  | 465             | 0.2 | 0.11            | -               | 3.9  | -    | 26  | 39  | 86  | 0.14 | 0.96 | 264  | 0.42 | 442.0 ± 4.8                       | 237.3 ± 11.1                      | 679.3 ± 32.7             |
| DC-D      | 40.44            | 0.49      | 7.90 | 2266       | 174  | 458             | 0.2 | 0.08            | -               | 5.4  | -    | 26  | 39  | 90  | 0.14 | 0.93 | 265  | 0.41 | 451.2 ± 3.9                       | 197.5 ± 9.9                       | 648.6 ± 32.9             |
| DC-DSW1   | 25.25            | 1.85      | 8.36 | 2074       | NC   | NC              | NC  | NC              | NC              | NC   | NC   | NC  | NC  | NC  | NC   | NC   | NC   | NC   | 407.0 ± 2.4                       | 154.7 ± 5.3                       | 561.6 ± 19.4             |
| DC-DSW2   | 2.42             | 3.21      | 7.81 | 1987       | 186  | 593             | 0.2 | 3.41            | -               | 3.2  | -    | 28  | 42  | 63  | 0.12 | 1.04 | 293  | 0.48 | 139.1 ± 0.9                       | 106.3 ± 2.7                       | 245.4 ± 6.4              |
| DC-PLAYA  | 11.80            | 2.22      | 7.72 | 2090       | 182  | 606             | 0.2 | 0.01            | -               | 4.9  | 0.21 | 27  | 41  | 65  | 0.11 | 0.99 | 289  | 0.45 | 174.7 ± 1.0                       | 98.7 ± 2.7                        | 273.4 ± 7.6              |
| DC-USW1   | 29.76            | 1.70      | 8.40 | 2093       | NC   | NC              | NC  | NC              | NC              | NC   | NC   | NC  | NC  | NC  | NC   | NC   | NC   | NC   | 675.3 ± 4.3                       | 321.0 ± 10.1                      | 996.3 ± 32.1             |
| DC-USW2   | 16.48            | 1.59      | 7.73 | 1995       | 172  | 578             | 0.2 | 0.15            | -               | 2.5  | -    | 29  | 41  | 61  | 0.13 | 1.03 | 291  | 0.47 | 567.1 ± 1.9                       | 240.5 ± 4.3                       | 807.6 ± 14.8             |
| DC-W1     | 27.14            | 1.98      | 8.50 | 2083       | 179  | 472             | 0.2 | 0.12            | -               | 3.0  | -    | 30  | 40  | 57  | 0.11 | 1.28 | 272  | 0.51 | 550.3 ± 3.1                       | 275.1 ± 7.8                       | 825.4 ± 23.8             |
| DC-W2     | 15.67            | 1.42      | 7.76 | 1908       | 177  | 598             | 0.2 | 0.22            | -               | 4.7  | -    | 29  | 42  | 64  | 0.12 | 1.00 | 280  | 0.45 | 780.1 ± 2.2                       | 311.0 ± 5.3                       | 1091.1 ± 18.8            |

[-] below detection limits

NC indicates water sample not collected for DC-USW1 and DC-DSW1
