# Supplementary material for: Oil & gas produced water retention ponds as potential passive treatment for radium removal and beneficial reuse
Source: Royal Society of Chemistry journal article supplement (doi:10.1039/d0em00413h), 2021-01-01
Supplement: d0em00413h3.pdf [file d0em00413h3.pdf]

Table S4. Porewater probe measurements (DO, pH, conductivity, ORP and temperature) collected in an anaerobic chamber, anion and cation concentrations (all in units of mg/L), and sediment core Ra activities measured via gamma spectrometry (all in units of Bq/kg).

| Sample            | Depth from surface (cm) | DO (mg/L) | DO (%) | pH   | Conductivity ( $\mu\text{S}/\text{cm}$ ) | Eh (mV) | Temperature ( $^{\circ}\text{C}$ ) | Sr    | Mn   | K   | Mg  | Fe    | B    | Na   | Ca  | Li   | Ba   | Cl  | SO <sub>4</sub> | Estimated HCO <sub>3</sub> | <sup>226</sup> Ra $\pm$ error | <sup>228</sup> Ra $\pm$ error | <sup>228</sup> Ra/ <sup>226</sup> Ra |
|-------------------|-------------------------|-----------|--------|------|------------------------------------------|---------|------------------------------------|-------|------|-----|-----|-------|------|------|-----|------|------|-----|-----------------|----------------------------|-------------------------------|-------------------------------|--------------------------------------|
| DC-W1 27-29 cm    | 29                      | 0.24      | 3.0    | 8.12 | 1661.6                                   | 101     | 26.0                               | 3.05  | 0.01 | 23  | 18  | 0.14  | 0.85 | 250  | 66  | 0.31 | 0.06 | 180 | 413             | 160.5                      | 617.8 $\pm$ 4.1               | 129.6 $\pm$ 7.2               | 0.21                                 |
| DC-W1 25-27 cm    | 27                      | 0.14      | 1.8    | 8.16 | 1634.9                                   | 93      | 25.5                               | 2.74  | 0.01 | 22  | 16  | 0.12  | 0.67 | 235  | 58  | 0.30 | 0.06 | 168 | 419             | 98.9                       | 633.0 $\pm$ 3.9               | 123.8 $\pm$ 6.8               | 0.20                                 |
| DC-W1 23-25 cm    | 25                      | 0.05      | 0.6    | 7.90 | 1604.1                                   | 112     | 25.1                               | 3.19  | 0.03 | 76  | 19  | 0.31  | 0.61 | 247  | 73  | 0.33 | 0.06 | 231 | 451             | 124.7                      | 590.1 $\pm$ 4.1               | 95.2 $\pm$ 7.2                | 0.16                                 |
| DC-W1 21-23 cm    | 23                      | 0.15      | 1.9    | 7.95 | 1568.5                                   | 61      | 24.9                               | 2.80  | 0.02 | 24  | 17  | 0.35  | 0.58 | 218  | 62  | 0.31 | 0.05 | 160 | 396             | 114.3                      | 641.6 $\pm$ 3.7               | 130.9 $\pm$ 6.3               | 0.20                                 |
| DC-W1 19-21 cm    | 21                      | 0.26      | 3.3    | 7.49 | 1733.8                                   | 112     | 25.1                               | 3.36  | 0.02 | 25  | 20  | 0.09  | 0.59 | 254  | 72  | 0.33 | 0.08 | 176 | 432             | 186.9                      | 627.4 $\pm$ 3.3               | 125.8 $\pm$ 5.8               | 0.20                                 |
| DC-W1 17-19 cm    | 19                      | 0.19      | 2.4    | 7.82 | 1594.4                                   | 87      | 25.5                               | 3.69  | 0.03 | 27  | 21  | 0.57  | 0.65 | 274  | 82  | 0.33 | 0.08 | 199 | 482             | 178.5                      | 605.0 $\pm$ 1.7               | 137.1 $\pm$ 3.1               | 0.23                                 |
| DC-W1 15-17 cm    | 17                      | 0.24      | 3.0    | 7.95 | 1055.2                                   | 95      | 24.1                               | 3.91  | 0.03 | 29  | 23  | 0.07  | 0.61 | 294  | 86  | 0.34 | 0.08 | 237 | 518             | 141.7                      | 662.3 $\pm$ 4.5               | 150.5 $\pm$ 8.0               | 0.23                                 |
| DC-W1 13-15 cm    | 15                      | 0.62      | 7.6    | 8.07 | 1681.4                                   | 117     | 23.7                               | 3.58  | 0.03 | 23  | 21  | 0.08  | 0.63 | 291  | 79  | 0.36 | 0.07 | 220 | 459             | 195.4                      | 652.1 $\pm$ 1.3               | 149.7 $\pm$ 2.4               | 0.23                                 |
| DC-W1 11-13 cm    | 13                      | 0.06      | 0.8    | 7.23 | 2730.7                                   | 220     | 26.5                               | 7.62  | 0.25 | 87  | 44  | 1.35  | 1.13 | 398  | 195 | 0.46 | 0.20 | 316 | 501             | 838.6                      | 623.3 $\pm$ 2.5               | 168.3 $\pm$ 4.8               | 0.27                                 |
| DC-W1 9-11 cm     | 11                      | 0.05      | 0.6    | 6.34 | 2811.7                                   | 183     | 24.8                               | 7.61  | 0.32 | 86  | 46  | 1.03  | 0.91 | 389  | 185 | 0.47 | 0.19 | 315 | 552             | 727.5                      | 431.9 $\pm$ 2.6               | 166.9 $\pm$ 5.9               | 0.39                                 |
| DC-W1 7-9 cm      | 9                       | 0.15      | 1.9    | 7.80 | 2110.7                                   | 60      | 26.8                               | 4.80  | 0.12 | 26  | 29  | 0.12  | 1.13 | 352  | 108 | 0.46 | 0.15 | 261 | 287             | 638.0                      | 610.2 $\pm$ 3.2               | 222.6 $\pm$ 7.2               | 0.36                                 |
| DC-W1 5-7 cm      | 7                       | 0.22      | 2.8    | 7.89 | 1934.6                                   | 117     | 24.7                               | 4.12  | 0.42 | 41  | 27  | 0.86  | 1.22 | 319  | 84  | 0.49 | 0.22 | 258 | 309             | 467.6                      | 708.6 $\pm$ 4.2               | 321.3 $\pm$ 9.7               | 0.45                                 |
| DC-W1 3-5 cm      | 5                       | 0.60      | 7.7    | 7.64 | 1719.6                                   | 95      | 26.3                               | 4.93  | 0.12 | 31  | 34  | 0.30  | 0.80 | 333  | 99  | 0.44 | 0.15 | 237 | 355             | 553.0                      | 708.7 $\pm$ 3.2               | 274.1 $\pm$ 7.3               | 0.39                                 |
| DC-W1 0-3 cm      | 3                       | 0.32      | 4.1    | 7.48 | 2119.4                                   | 7       | 24.7                               | 6.27  | 0.26 | 29  | 49  | 0.15  | 0.76 | 321  | 114 | 0.47 | 0.13 | 225 | 458             | 528.7                      | 534.8 $\pm$ 4.4               | 261.4 $\pm$ 9.9               | 0.49                                 |
| DC-W2 18-20 cm    | 20                      | 0.16      | 2.0    | 7.92 | 2292.8                                   | 42      | 25.6                               | 4.74  | 0.44 | 34  | 35  | 3.05  | 1.42 | 387  | 133 | 0.48 | 0.33 | 329 | 9               | 1091.2                     | 323.5 $\pm$ 1.6               | 114.5 $\pm$ 3.3               | 0.35                                 |
| DC-W2 16-18 cm    | 18                      | 0.29      | 3.7    | 7.85 | 2255.3                                   | 77      | 25.5                               | 3.76  | 0.44 | 34  | 33  | 1.67  | 1.30 | 382  | 84  | 0.46 | 0.22 | 321 | 6               | 935.5                      | 267.7 $\pm$ 1.1               | 110.4 $\pm$ 2.5               | 0.41                                 |
| DC-W2 14-16 cm    | 16                      | 0.11      | 1.5    | 7.23 | 2181.1                                   | 15      | 25.0                               | 3.91  | 0.39 | 50  | 34  | 1.69  | 1.20 | 398  | 87  | 0.48 | 0.21 | 311 | 5               | 1036.0                     | 377.9 $\pm$ 1.8               | 120.8 $\pm$ 3.7               | 0.32                                 |
| DC-W2 12-14 cm    | 14                      | 0.20      | 2.6    | 7.74 | 2241.8                                   | 80      | 25.2                               | 5.77  | 0.45 | 33  | 37  | 1.48  | 1.30 | 386  | 174 | 0.46 | 0.32 | 273 | 7               | 1321.7                     | 368.1 $\pm$ 2.6               | 132.1 $\pm$ 5.5               | 0.36                                 |
| DC-W2 10-12 cm    | 12                      | O.O.R.    | O.O.R. | 7.94 | 2155.9                                   | -85     | 24.4                               | 3.71  | 0.22 | 30  | 34  | 0.34  | 1.33 | 376  | 77  | 0.43 | 0.16 | 265 | 78              | 899.1                      | 385.4 $\pm$ 2.1               | 115.5 $\pm$ 4.5               | 0.30                                 |
| DC-W2 8-10 cm     | 10                      | O.O.R.    | O.O.R. | 7.87 | 2346.9                                   | -18     | 24.0                               | 6.11  | 0.53 | 35  | 49  | 12.48 | 1.31 | 387  | 184 | 0.51 | 0.29 | 262 | 216             | 1170.5                     | 331.3 $\pm$ 2.8               | 134.5 $\pm$ 6.1               | 0.41                                 |
| DC-W2 6-8 cm      | 8                       | 0.33      | 3.9    | 7.58 | 2058.0                                   | 13      | 21.7                               | 5.27  | 0.34 | 32  | 49  | 0.38  | 1.09 | 372  | 111 | 0.47 | 0.12 | 241 | 354             | 765.9                      | 355.2 $\pm$ 2.2               | 127.5 $\pm$ 4.7               | 0.36                                 |
| DC-W2 4-6 cm      | 6                       | 0.55      | 6.5    | 7.18 | 2476.4                                   | 89      | 21.8                               | 6.33  | 0.69 | 27  | 54  | 1.31  | 1.12 | 353  | 148 | 0.45 | 0.11 | 238 | 541             | 609.9                      | 428.6 $\pm$ 1.8               | 138.5 $\pm$ 3.7               | 0.32                                 |
| DC-W2 2-4 cm      | 4                       | O.O.R.    | O.O.R. | 7.09 | 2297.1                                   | -60     | 21.8                               | 6.57  | 0.99 | 39  | 51  | 7.27  | 0.89 | 322  | 151 | 0.41 | 0.12 | 214 | 499             | 638.5                      | 432.8 $\pm$ 3.1               | 154.1 $\pm$ 6.7               | 0.36                                 |
| DC-W2 0-2 cm      | 2                       | 0.99      | 11.4   | 7.18 | 2918.4                                   | 126     | 20.7                               | 11.61 | 0.97 | 52  | 90  | 2.57  | 0.92 | 355  | 216 | 0.47 | 0.19 | 201 | 1095            | 412.2                      | 616.8 $\pm$ 4.3               | 204.2 $\pm$ 9.2               | 0.33                                 |
| DA-W1 14-16 cm    | 16                      | 0.57      | 7.2    | 8.20 | 5914.4                                   | 59      | 25.5                               | 9.13  | 0.16 | 107 | 73  | 0.88  | 2.64 | 1044 | 269 | 1.31 | 0.06 | 743 | 2108            | 180.7                      | 304.9 $\pm$ 2.5               | 162.6 $\pm$ 5.8               | 0.53                                 |
| DA-W1 12-14 cm    | 14                      | 0.31      | 4.0    | 8.08 | 6057.7                                   | -3      | 25.8                               | 9.25  | 0.05 | 110 | 74  | 0.12  | 2.85 | 1051 | 276 | 1.36 | 0.05 | 785 | 2133            | 121.4                      | 116.0 $\pm$ 1.3               | 88.8 $\pm$ 3.8                | 0.77                                 |
| DA-W1 10-12 cm    | 12                      | 0.17      | 2.2    | 7.32 | 5803.9                                   | -13     | 25.8                               | 8.64  | 0.07 | 105 | 71  | 0.52  | 3.26 | 1022 | 265 | 1.35 | 0.03 | 729 | 2121            | 103.1                      | 493.7 $\pm$ 2.0               | 159.4 $\pm$ 4.1               | 0.32                                 |
| DA-W1 8-10 cm     | 10                      | 0.28      | 3.5    | 8.18 | 5167.0                                   | 4       | 25.8                               | 7.39  | 0.07 | 93  | 65  | 0.14  | 2.62 | 866  | 226 | 1.11 | 0.03 | 615 | 1882            | 14.4                       | 1155.2 $\pm$ 6.0              | 242.6 $\pm$ 11.1              | 0.21                                 |
| DA-W1 6-8 cm      | 8                       | 0.45      | 5.7    | 7.83 | 3963.5                                   | 44      | 25.5                               | 7.67  | 0.06 | 107 | 67  | 0.19  | 2.80 | 872  | 228 | 1.09 | 0.03 | 641 | 1907            | 0.0                        | 1218.5 $\pm$ 6.2              | 331.5 $\pm$ 11.9              | 0.27                                 |
| DA-W1 4-6 cm      | 6                       | 2.35      | 28.1   | 8.08 | 5075.1                                   | 137     | 22.5                               | 8.04  | 0.06 | 92  | 69  | 0.00  | 2.94 | 885  | 245 | 1.07 | 0.03 | 635 | 1949            | 30.4                       | 1442.7 $\pm$ 3.2              | 613.2 $\pm$ 7.4               | 0.43                                 |
| DA-W1 2-4 cm      | 4                       | 0.54      | 6.9    | 8.00 | 5268.4                                   | 65      | 25.7                               | 8.13  | 0.04 | 87  | 69  | 0.19  | 2.84 | 859  | 257 | 0.99 | 0.04 | 610 | 1954            | 23.8                       | 1570.5 $\pm$ 6.4              | 890.1 $\pm$ 16.4              | 0.57                                 |
| DA-W1 0-2 cm      | 2                       | 0.08      | 1.0    | 7.86 | 6033.6                                   | -31     | 25.0                               | 9.12  | 0.05 | 162 | 75  | 0.26  | 2.90 | 888  | 306 | 1.10 | 0.03 | 716 | 2116            | 8.7                        | 1392.1 $\pm$ 6.8              | 911.8 $\pm$ 19.1              | 0.65                                 |
| CSW 28-30 cm      | 30                      | 1.19      | 14.6   | 7.79 | 10641.8                                  | 84      | 24.0                               | 5.77  | 1.67 | 23  | 414 | 0.60  | 1.74 | 2576 | 285 | 1.79 | 0.06 | 37  | 7691            | 0.0                        | 55.7 $\pm$ 0.5                | 65.8 $\pm$ 1.9                | 1.18                                 |
| CSW 26-28 cm      | 28                      | 0.78      | 9.6    | 7.98 | 16253.5                                  | 72      | 24.6                               | 7.64  | 3.20 | 71  | 637 | 1.27  | 2.86 | 4650 | 356 | 3.49 | -    | 87  | 13811           | 0.0                        | 57.4 $\pm$ 0.9                | 68.0 $\pm$ 3.2                | 1.18                                 |
| CSW 24-26 cm      | 26                      | 0.20      | 2.5    | 7.94 | 19174.8                                  | 60      | 24.8                               | 8.42  | 3.33 | 15  | 715 | 1.43  | 2.99 | 4991 | 356 | 3.78 | -    | 24  | 18211           | 0.0                        | 54.0 $\pm$ 0.5                | 64.9 $\pm$ 1.8                | 1.20                                 |
| CSW 22-24 cm      | 24                      | 0.12      | 1.5    | 7.92 | 18872.5                                  | 42      | 24.6                               | 9.15  | 3.39 | 16  | 753 | 3.32  | 3.00 | 5037 | 373 | 3.84 | -    | 26  | 24025           | 0.0                        | 57.5 $\pm$ 0.7                | 70.8 $\pm$ 2.2                | 1.23                                 |
| CSW 20-22 cm      | 22                      | 0.50      | 6.2    | 7.94 | 19271.4                                  | 76      | 23.8                               | 9.01  | 2.96 | 24  | 772 | 1.74  | 2.89 | 4813 | 383 | 3.68 | -    | 30  | 14890           | 0.0                        | 58.5 $\pm$ 0.6                | 75.6 $\pm$ 2.1                | 1.29                                 |
| CSW 18-20 cm      | 20                      | 0.22      | 2.7    | 7.84 | 18933.6                                  | 50      | 24.5                               | 9.17  | 2.58 | 22  | 763 | 3.79  | 2.83 | 4618 | 390 | 3.59 | -    | 26  | 16445           | 0.0                        | 59.1 $\pm$ 0.6                | 68.4 $\pm$ 2.1                | 1.16                                 |
| CSW 16-18 cm      | 18                      | 0.20      | 2.5    | 7.99 | 17960.9                                  | 51      | 25.3                               | 9.05  | 2.05 | 23  | 734 | 2.22  | 2.65 | 4281 | 379 | 3.38 | -    | 27  | 14751           | 0.0                        | 66.8 $\pm$ 1.5                | 86.0 $\pm$ 5.5                | 1.29                                 |
| CSW 14-16 cm      | 16                      | 0.39      | 4.8    | 7.87 | 17524.5                                  | 65      | 24.3                               | 9.32  | 1.69 | 23  | 759 | 2.11  | 2.21 | 4142 | 378 | 3.34 | -    | 26  | 14455           | 0.0                        | 54.1 $\pm$ 0.9                | 74.9 $\pm$ 3.1                | 1.39                                 |
| CSW 12-14 cm      | 14                      | 0.41      | 5.0    | 7.91 | 16462.7                                  | 62      | 24.3                               | 8.76  | 1.24 | 26  | 683 | 1.22  | 2.41 | 3702 | 350 | 3.01 | 0.03 | 34  | 14939           | 0.0                        | 51.5 $\pm$ 0.6                | 63.2 $\pm$ 2.0                | 1.23                                 |
| CSW 10-12 cm      | 12                      | 0.27      | 3.3    | 7.93 | 14551.7                                  | 53      | 25.3                               | 8.26  | 0.96 | 23  | 659 | 1.34  | 2.01 | 3291 | 320 | 2.70 | -    | 24  | 11643           | 0.0                        | 54.3 $\pm$ 0.9                | 60.1 $\pm$ 3.2                | 1.11                                 |
| CSW 8-10 cm       | 10                      | 0.30      | 3.7    | 7.92 | 12994.3                                  | 45      | 23.1                               | 7.66  | 0.89 | 22  | 608 | 1.15  | 1.98 | 2820 | 299 | 2.38 | -    | 22  | 9560            | 0.0                        | 49.8 $\pm$ 0.6                | 62.9 $\pm$ 2.2                | 1.26                                 |
| CSW 6-8 cm        | 8                       | 0.08      | 1.0    | 7.89 | 10589.9                                  | -32     | 23.2                               | 7.56  | 0.92 | 22  | 588 | 1.38  | 1.63 | 2506 | 298 | 2.13 | 0.03 | 20  | 9580            | 0.0                        | 48.1 $\pm$ 0.6                | 59.8 $\pm$ 2.1                | 1.24                                 |
| CSW 4-6 cm        | 6                       | 0.12      | 1.5    | 7.96 | 9618.4                                   | -46     | 23.4                               | 6.66  | 0.83 | 20  | 500 | 0.54  | 1.26 | 1983 | 274 | 1.68 | 0.03 | 17  | 7086            | 0.0                        | 44.1 $\pm$ 0.5                | 51.0 $\pm$ 2.0                | 1.16                                 |
| CSW 2-4 cm        | 4                       | O.O.R.    | O.O.R. | 7.87 | 7926.2                                   | -49     | 23.7                               | 5.95  | 0.94 | 23  | 413 | 0.23  | 1.07 | 1560 | 253 | 1.33 | 0.05 | 17  | 7161            | 0.0                        | 56.8 $\pm$ 0.7                | 63.8 $\pm$ 2.4                | 1.12                                 |
| CSW 0-2 cm        | 2                       | O.O.R.    | O.O.R. | 7.59 | 5437.4                                   | -52     | 23.8                               | 4.09  | 1.29 | 27  | 271 | 0.30  | 0.60 | 932  | 197 | 0.76 | 0.08 | 17  | 3144            | 456.5                      | 61.0 $\pm$ 0.7                | 65.1 $\pm$ 2.5                | 1.07                                 |
| DC-PLAYA 16-18 cm | 18                      | 0.17      | 2.1    | 7.66 | 4564.4                                   | 48      | 25.5                               | 6.69  | 2.73 | 32  | 100 | 7.66  | 2.69 | 557  | 504 | 0.78 | 0.03 | 320 | 2277            | 128.4                      | 61.8 $\pm$ 0.7                | 76.9 $\pm$ 2.39               | 1.24                                 |
| DC-PLAYA 14-16 cm | 16                      | 0.12      | 1.5    | 7.45 | 4142.7                                   | 86      | 24.4                               | 6.93  | 3.12 | 45  | 103 | 9.63  | 2.41 | 549  | 511 | 0.84 | -    | 319 | 2127            | 358.0                      | 55.5 $\pm$ 0.9                | 76.5 $\pm$ 3.11               | 1.38                                 |
| DC-PLAYA 12-14 cm | 14                      | 0.18      | 2.2    | 7.37 | 4082.2                                   | 91      | 24.1                               | 7.61  | 3.12 | 34  | 103 | 13.74 | 2.22 | 552  | 457 | 0.75 | 0.09 | 313 | 1979            | 388.9                      | 61.9 $\pm$ 0.7                | 73.3                          |                                      |
