# Supplementary material for: Oil & gas produced water retention ponds as potential passive treatment for radium removal and beneficial reuse
Source: Royal Society of Chemistry journal article supplement (doi:10.1039/d0em00413h), 2021-01-01
Supplement: d0em00413h4.pdf [file d0em00413h4.pdf]

Table S6. XRD results for select sediment samples including quantification of minerals for DC-W1 3-5 cm, DC-W2 10-12 cm, and DC-W2 16-18 cm.

| Sample                 | Mineral 1     | Mineral 2        | Mineral 3          | Mineral 4            | Mineral 5       | Mineral 6                | Mineral 7       | Mineral 8                | Mineral 9             | Mineral 10     | Mineral 11               | Quantified |
|------------------------|---------------|------------------|--------------------|----------------------|-----------------|--------------------------|-----------------|--------------------------|-----------------------|----------------|--------------------------|------------|
| DC-W1 3-5 cm           | calcite (75%) | quartz (11%)     | pellyite (6%)      | montmorillonite (5%) | halloysite (2%) | dickite (<1%)            | celestite (<1%) | anorthite (<1%)          | -                     | -              | -                        | yes        |
| DC-W1 13-15 cm         | quartz        | calcite          | montmorillonite    | -                    | -               | -                        | -               | -                        | -                     | -              | -                        | no         |
| DC-W1 13-15 cm residue | quartz        | calcite          | orthoclase         | anorthite            | montmorillonite | magnetite                | -               | -                        | -                     | -              | -                        | no         |
| DC-W1 23-25 cm         | quartz        | calcite          | montmorillonite    | barite (trace)       | -               | -                        | -               | -                        | -                     | -              | -                        | no         |
| DC-W2 2-4 cm           | quartz        | montmorillonite  | halloysite         | celestite (trace)    | gypsum (trace)  | -                        | -               | -                        | -                     | -              | -                        | no         |
| DC-W2 10-12 cm         | quartz (48%)  | albite (15%)     | illite (13%)       | microcline (9%)      | dolomite (5%)   | calcite (4%)             | kaolinite (3%)  | chlorite-serpentine (1%) | montmorillonite (<1%) | barite (<0.5%) | manganomanganite (<0.5%) | yes        |
| DC-W2 10-12 cm residue | quartz        | montmorillonite  | illite             | albite               | barite (trace)  | -                        | -               | -                        | -                     | -              | -                        | no         |
| DC-W2 16-18 cm         | quartz (50%)  | halloysite (11%) | johannsenite (11%) | albite (7%)          | orthoclase (5%) | chlorite-serpentine (5%) | anorthite (4%)  | dolomite (4%)            | montmorillonite (2%)  | barite (<0.5%) | -                        | yes        |
