# Supplementary material for: Oil & gas produced water retention ponds as potential passive treatment for radium removal and beneficial reuse
Source: Royal Society of Chemistry journal article supplement (doi:10.1039/d0em00413h), 2021-01-01
Supplement: d0em00413h5.pdf [file d0em00413h5.pdf]

## Supplemental Information

Oil & Gas Produced Water Retention Ponds as Potential Passive Treatment for Radium Removal and Beneficial Reuse

Bonnie McDevitt<sup>1</sup>, Molly C. McLaughlin<sup>2,3</sup>, Jens Blotevogel<sup>3</sup>, Thomas Borch<sup>3,4,5</sup>, Nathaniel R. Warner<sup>1\*</sup>

<sup>1</sup> Department of Civil and Environmental Engineering, The Pennsylvania State University, 212 Sackett Building, University Park, PA 16801, USA

<sup>2</sup> Abt Associates Inc., 2755 Canyon Blvd., Boulder, CO, 80301

<sup>3</sup> Department of Civil and Environmental Engineering, Colorado State University, 1170 Campus Delivery, Fort Collins, CO, 80523-1170, USA

<sup>4</sup> Department of Soil and Crop Sciences, Colorado State University, 1170 Campus Delivery, Fort Collins, Colorado 80523, USA

<sup>5</sup> Department of Chemistry, Colorado State University, 1872 Campus Delivery, Fort Collins, Colorado, 80523, USA

\*corresponding author, [nrw6@psu.edu](mailto:nrw6@psu.edu)

## 2. Materials and Methods

### 2.1 Site description

The large O&G fields represented in this study are underlain by tertiary and quaternary deposits with soils reported comprising calcium carbonate mineral upwards of 40% and gypsum upwards of 15%<sup>1</sup>. However, McDevitt et al. (2019) previously found only trace amounts of gypsum in grab sediments and while calcium carbonate dominated grab sediments near NPDES discharges, compositions decreased with increasing distance from the discharges<sup>2</sup>.

Facility DA-D discharges an average 1.5 million L treated PW/day which flows into a large, shallow, carbonate-terraced PWRP (DA-W1) that is approximately 40,000 m<sup>2</sup>. From average DA-D discharge, and assuming the area of DA-W1 with a water depth of ~0.33 m, estimated hydraulic retention time in DA-W1 is approximately 9 days. From the first PWRP,

water flows approximately 0.3 km into a much larger PWRP (DA-W2) that is largely unvegetated apart from some exteriorly established grasses and is approximately 390,000 m<sup>2</sup>. Estimated hydraulic retention time based on a depth of ~0.33 m is 86 days. From this second PWRP, treated PW flows approximately 12 additional km prior to discharge into a large perennial river (previously River B). Facility DB-D discharges an average 310,000 L treated PW/day that is combined from 13 wells. Approximately 0.8 km downstream from the discharge is a created PWRP (DB-W1) approximately 350 m<sup>2</sup>. Assuming a 0.165 m wide and 0.165 m deep stream for 0.8km, estimated hydraulic retention time in DB-W1 is 0.19 days or ~4.6 hours. Water exits this PWRP from an outfall pipe (DB-DSW1) that feeds a much larger, shallow pond 0.3 km downstream which was dry during this sampling campaign. DB-D is approximately 56 km upstream of the confluence with a perennial river (previously River B). Facility DC-D discharges an average of 4.5 million L treated PW/day. Approximately 1.8 km downstream the water flows into a 450 m<sup>2</sup> created PWRP (DC-W1) after which a dam divides the discharge into two equivalent streams. One of the streams continues 5.2 km where it flows into a second 2500 m<sup>2</sup> created PWRP (DC-W2) and beyond for an additional 25 km prior to emptying into a large perennial river (previously River C). From estimated areas of DC-W1 and DC-W2 and assuming a consistent measured average upstream velocity of 0.036 m<sup>3</sup>/s, estimated hydraulic retention time in DC-W1 is approximately 11 hours and in DC-W2 is approximately 4 days. Perennial Rivers B and C ultimately flow into a reservoir which has a municipal drinking water intake and is a crop irrigation source downstream. The second diverted stream flows approximately 2 km into a shallow, playa lake (DC-PLAYA) intended to sustain wildlife habitat.

**Table S1:** Previous study sample site names from McDevitt et al. 2019, 2020b for discharges represented in the current study.

| <b>Current Site ID</b> | <b>Previous Study ID</b> |
|------------------------|--------------------------|
| DA-D                   | DB-4.0                   |
| DB-D                   | DB-2.0                   |
| DB-100m                | DB-2.0 100m              |
| DB-DSW1                | DB-2.1                   |
| DC-D                   | DC-1                     |
| DC-100m                | DC-1 100m                |
| DC-W1                  | downstream of DC-2       |

## *2.2 Field Sampling*

Grab sediments for Ra analysis were collected in triplicate from the upper 5 cm of sediment and stored in plastic containers. Grab sediments for TOC and TIC analysis were collected in glass bottles. Grab samples were collected along the sides of the stream channels at the water surface level in areas of sediment accumulation.

Plastic core tubes were new and rinsed 3 times with field site water prior to sediment collection. More sediment cores would have been collected if possible but some of the sediments were either too gravelly to allow for pushing a core tube into or too sludgy to obtain enough suction to bring the sediment to the surface. Sediment cores were stored within the plastic tubing until extraction in the laboratory.

## *2.3 Laboratory Analysis of Samples*

Grab sediments were dried in an oven at 60°C, ground to homogeneity with a mortar and pestle, sieved to 1.18 mm diameter in order to exclude rocks and larger material, and then packed into HDPE liquid scintillation vials with a urea gas seal cap. Vials were then wrapped with

parafilm to prevent the escape of  $^{226}\text{Ra}$  daughter product,  $^{222}\text{Rn}$ . Samples were then incubated for at least 21 days to establish secular equilibrium of  $^{226}\text{Ra}$  daughter products,  $^{214}\text{Pb}$  and  $^{214}\text{Bi}$ . Samples were measured to counting errors  $< 5\%$  per peak, background counts were subtracted, and a uranium ore tailing standard (UTS-2) from Canadian Certified Reference Material project was utilized as a calibration standard for detector efficiency.

Grab sediments were also analyzed for TC, TIC and TOC at Colorado State University. Frozen grab sediments were thawed, dried within glass storage containers at  $105^{\circ}\text{C}$  in a muffle furnace, and sieved to 2 mm diameter. TC was measured on a LECO TruSpec CN autosampler and reported as percent sediment mass (dry weight). Sidney High soil standard was used to calibrate the instrument. TIC was measured via a calcimeter pressure transducer and voltage meter after adding 2 mL of 6N HCl + 3% ferrous chloride solution to a 1.84 mL vial, capping and shaking for one minute, and allowing to rest for 2 hours. Concentrations were deduced from a 7-point  $\text{CaCO}_3$  standard curve and reported as percent sediment mass (dry weight).

After each leaching step, sediment core samples were centrifuged for 20 minutes at 10,000 RPM. Leachates were then decanted and filtered through 0.45- $\mu\text{m}$  nylon filters. After steps 2 through 5, residues were rinsed, shaken, and centrifuged three times with 5 mL each of ultra-pure distilled water to ensure adequate removal of target species. Rinse water was filtered and combined with initial leachate. Leachate pH was measured immediately following and preserved with nitric acid to  $\text{pH} < 2$  for cation analysis. Sediment residues after each leaching step were freeze dried, packed into 24-mL liquid scintillation vials, and analyzed by gamma spectrometry. Because samples were not incubated for 21 days,  $^{226}\text{Ra}$  was analyzed by direct measurement at the 186 keV peak after deconvolution of the  $^{235}\text{U}$  63 keV peak.  $^{228}\text{Ra}$  was measured the same way as grab sediment and core samples, via the 911 keV peak.

A subset of sediment samples (n=8) that included the original sediments from the leached DC-W1 and DC-W2 core sections (DC-W1 3-5, DC-W1 13-15, DC-W1 23-25, DC-W2 2-4, DC-W2 10-12, DC-W2 16-18) and two final leaching residues from DC-W1 13-15 cm and DC-W2 10-12 cm were analyzed by X-ray diffraction (PANalytical Empyrean and Jade software) at the Material Characterization Laboratory (MCL) at The Pennsylvania State University. Quantification was only achieved for three samples due to the complexity of the mineralogical matrix. However, minerals are listed in order of relative abundance for all samples in Table S5.

Vegetation was thawed and then rinsed three times in an ultra-pure distilled water bath as a bulk sediment removal step. Vegetation was then soaked in a bath of ultra-pure distilled water and Triton™ X-100 surfactant (~1% solution) to remove recalcitrant clay particles from the vegetation<sup>3</sup>. A final ultra-pure distilled water bath and rinse was employed to remove the surfactant and any remaining sediment. Vegetation was separated into roots, leaves (cattails) or stems (grass and bulrush), and seeds if present. Samples were then freeze dried, ground to homogeneity and a small size fraction utilizing a blender, and then packed densely into 24-mL liquid scintillation vials for gamma analysis after 21 days of incubation similarly to grab and core sediments. Two samples of dried cattail seed heads (CSW and DC-W2) were separately stored upon collection and packed for gamma analysis without any additional preparation.

### 3. Results and Discussion

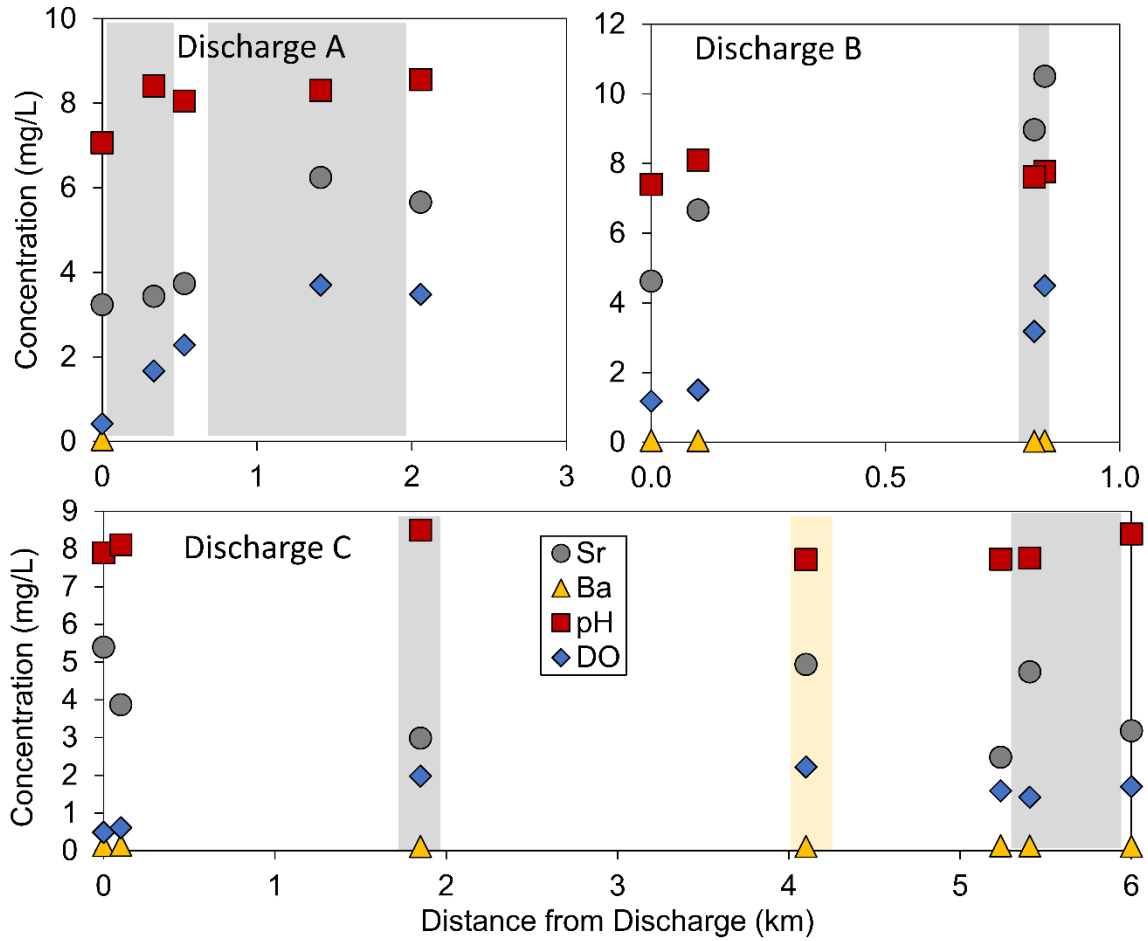

**Figure S1.** Sr, Ba, pH and dissolved oxygen (DO) concentrations versus distance from respective NPDES discharge A, B and C. Gray bars indicate PWRPs and the yellow bar represents the playa lake on the Discharge C PW stream.

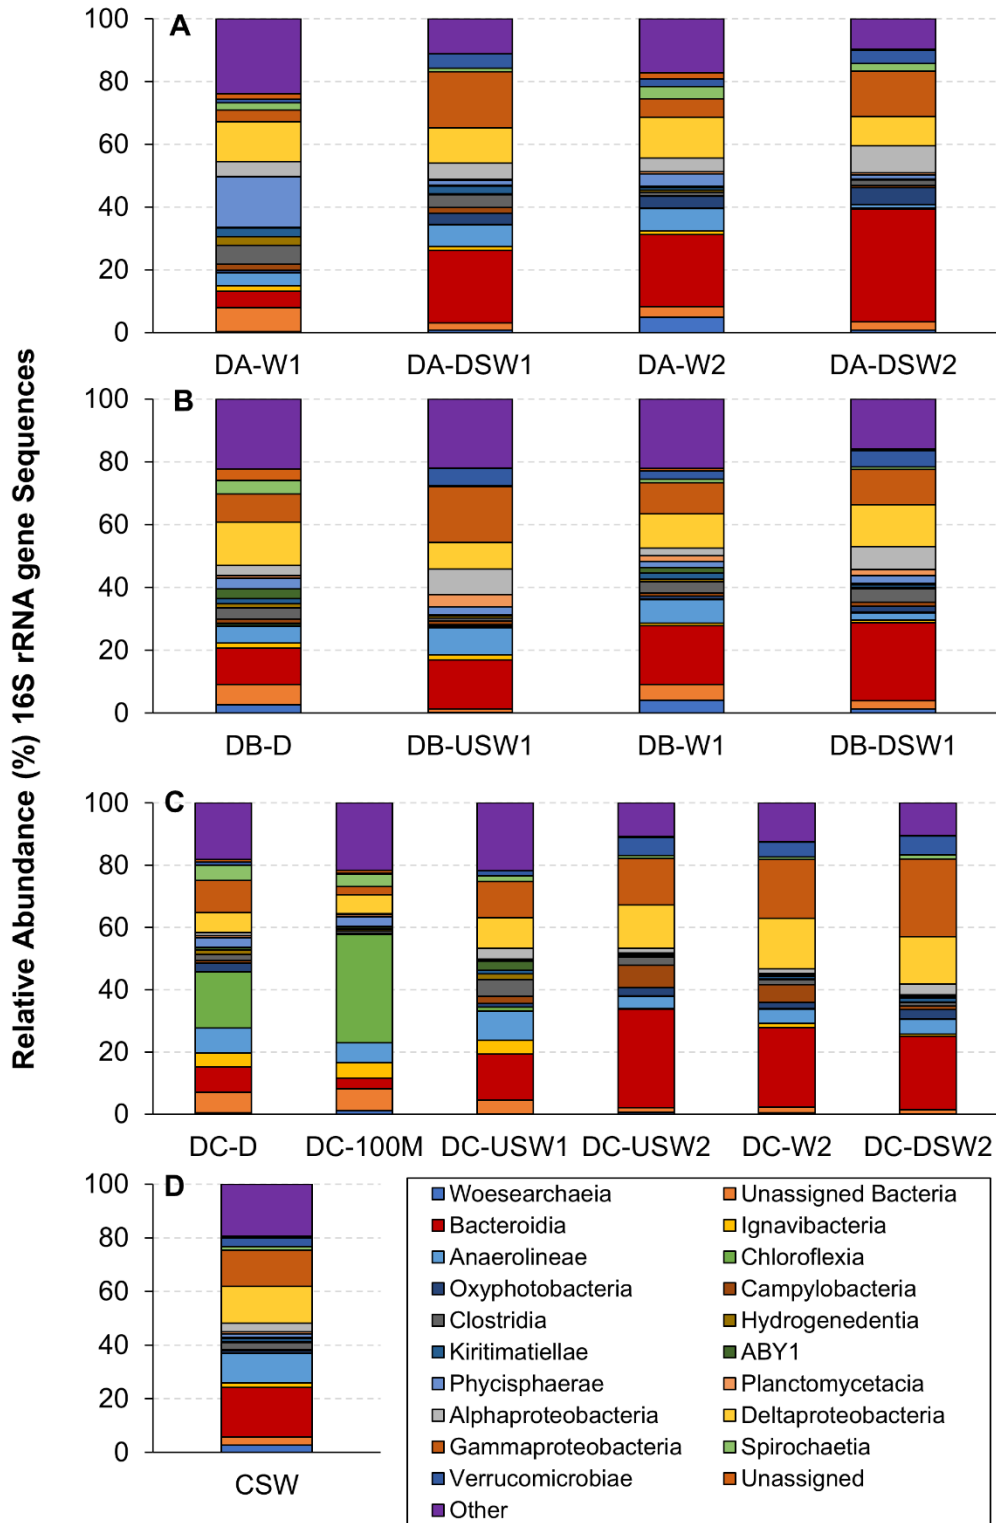

**Figure S2.** Grab sediment microbial community relative abundance (%) from 16S rRNA gene sequencing. Note the high relative abundance of Chloroflexia at DC-D and DC-100m and increasing relative abundance of Deltaproteobacteria from DC-D to DC-DSW2.

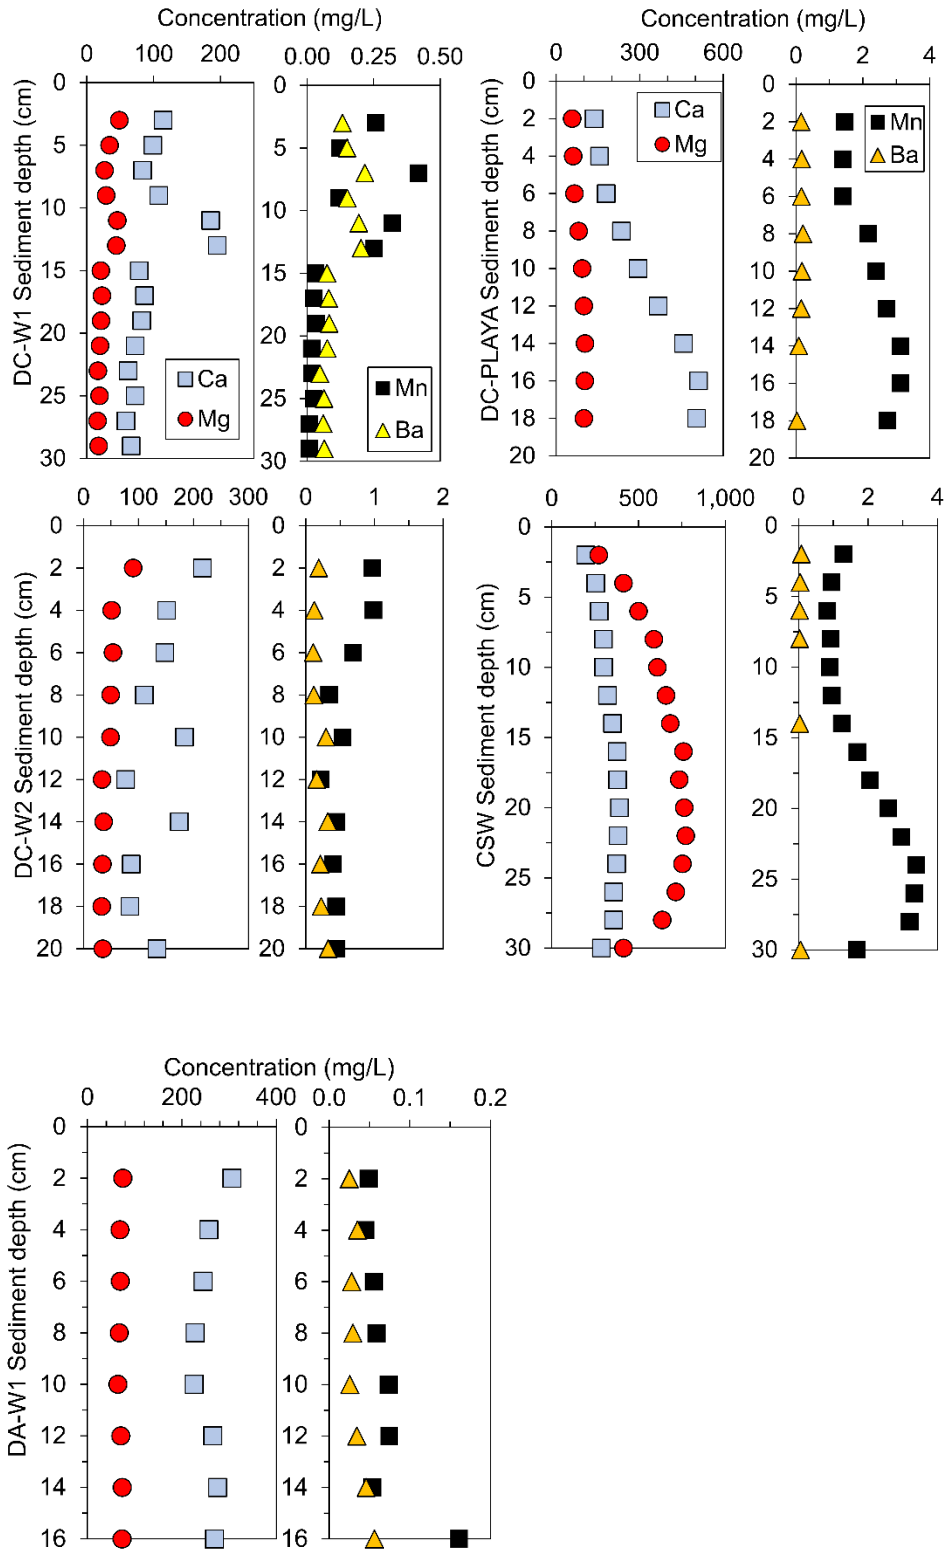

**Figure S3.** Scaled core porewater profiles for Ca, Mg, Ba and Mn concentrations versus sediment depth.



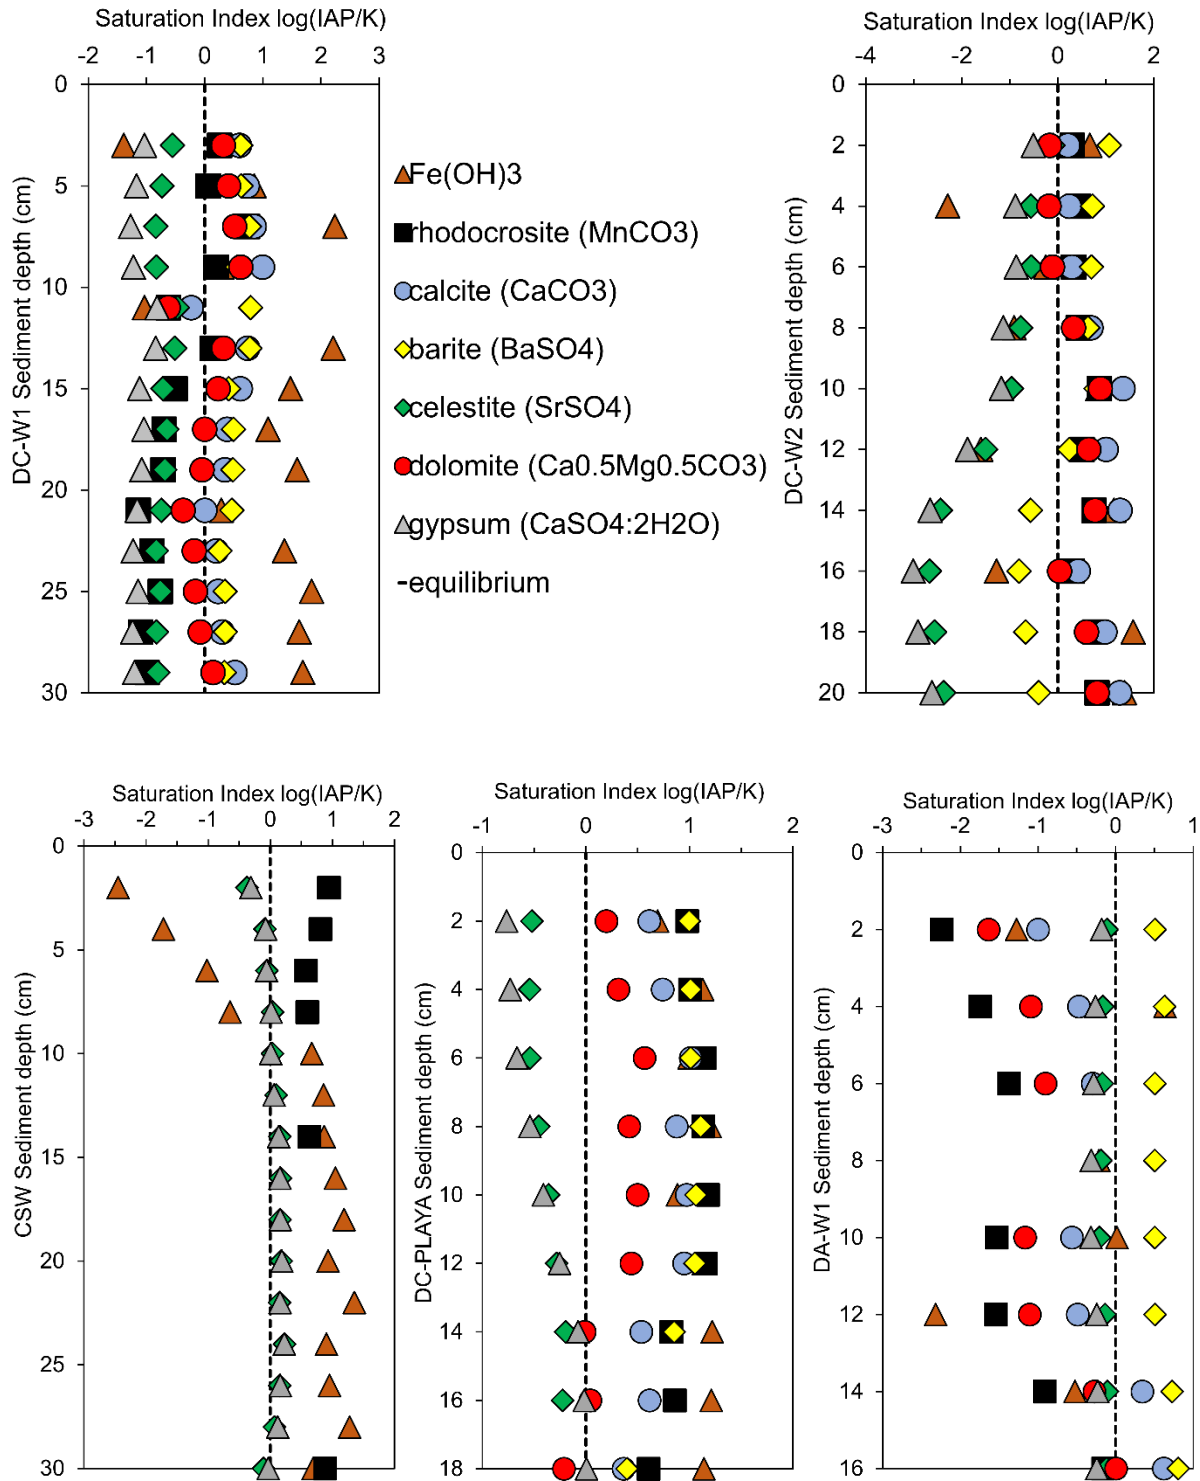

**Figure S4.** Saturation indices (SI) as  $\log(IAP/K_{eq})$  calculated using sediment core porewater chemistry and PHREEQC. The dashed line at an SI value of 0 indicates equilibrium. Minerals with an SI value greater than 0 indicate supersaturation and potential for dissolution whereas SI values less than 0 indicate undersaturation and potential for precipitation.

## References

- (1) NRCS. NRCS Web Soil Survey  
<https://websoilsurvey.sc.egov.usda.gov/App/HomePage.htm>.
- (2) McDevitt, B.; McLaughlin, M.; Cravotta, C. A.; Ajemigbitse, M. A.; Van Sice, K. J.; Blotevogel, J.; Borch, T.; Warner, N. R. Emerging Investigator Series: Radium Accumulation in Carbonate River Sediments at Oil and Gas Produced Water Discharges: Implications for Beneficial Use as Disposal Management. *Environ. Sci. Process. Impacts* **2019**, *21* (2), 324–338. <https://doi.org/10.1039/C8EM00336J>.
- (3) Edwards, W. R.; Smith, K. E. Exploratory Experiments on the Stability of Mineral Profiles of Feathers. *J. Wildl. Manage.* **1984**, *48* (3), 853–866.  
<https://doi.org/10.2307/3801432>.

Table S2. Field measurements, major anions and cations and grab sediment Ra-226, Ra-228 and Total Ra reported as Bq/kg. All anion and cation concentrations are reported as mg/L.

| Site Name | Temperature (°C) | DO (mg/L) | pH   | EC (uS/cm) | Cl   | SO <sub>4</sub> | Br   | NO <sub>3</sub> | PO <sub>4</sub> | Sr   | Mn   | K   | Mg  | Ca   | Ba   | B    | Na   | Li   | <sup>226</sup> Ra ± error (Bq/kg) | <sup>228</sup> Ra ± error (Bq/kg) | Total Ra ± error (Bq/kg) |
|-----------|------------------|-----------|------|------------|------|-----------------|------|-----------------|-----------------|------|------|-----|-----|------|------|------|------|------|-----------------------------------|-----------------------------------|--------------------------|
| CSW       | 4.85             | 1.56      | 8.80 | 900        | 6    | 318             | 0.14 | 0.08            | 4.3             | -    | 3    | 41  | 44  | 0.02 | 0.08 | 81   | 0.08 |      | 44.4 ± 0.6                        | 45.2 ± 2.0                        | 89.6 ± 4.2               |
| DA-D      | 35.43            | 0.42      | 7.07 | 6404       | 672  | 1868            | 1.0  | 0.13            | 0.11            | 3.2  | -    | 80  | 71  | 304  | 0.04 | 3.09 | 780  | 1.46 | 1013.3 ± 3.5                      | 739.9 ± 10.0                      | 1753.2 ± 24.4            |
| DA-DSW1   | 3.62             | 2.28      | 8.05 | 6325       | 631  | 1795            | 1.0  | 0.15            | -               | 3.7  | -    | 95  | 90  | 314  | -    | 4.17 | 1018 | 1.68 | 520.7 ± 5.4                       | 271.8 ± 13.0                      | 792.5 ± 38.7             |
| DA-DSW2   | 2.37             | 3.48      | 8.56 | 11410      | 1531 | 4279            | 2.3  | 0.18            | 0.13            | 5.7  | -    | 172 | 168 | 363  | -    | 7.92 | 2252 | 3.02 | 229.2 ± 1.3                       | 213.3 ± 4.1                       | 442.6 ± 8.8              |
| DA-W1     | 1.96             | 1.67      | 8.41 | 5788       | 660  | 1865            | 0.9  | 0.31            | -               | 3.4  | -    | 90  | 77  | 275  | -    | 3.33 | 890  | 1.52 | 1518.0 ± 7.2                      | 1202.8 ± 21.2                     | 2720.8 ± 49.6            |
| DA-W2     | 2.11             | 3.70      | 8.30 | 7829       | 1038 | 2711            | 1.4  | 0.22            | 0.12            | 6.2  | -    | 109 | 102 | 286  | -    | 4.63 | 1303 | 1.89 | 233.5 ± 2.4                       | 135.5 ± 6.5                       | 369.1 ± 18.1             |
| DB-100m   | 6.62             | 1.50      | 8.10 | 4719       | 391  | 1749            | 0.6  | 0.11            | 0.07            | 6.7  | -    | 110 | 93  | 315  | 0.04 | 2.78 | 569  | 1.61 | 2724.1 ± 9.1                      | 1565.3 ± 24.4                     | 4289.4 ± 68.4            |
| DB-D      | 10.55            | 1.18      | 7.40 | 5084       | 437  | 2068            | 0.7  | 0.15            | 0.12            | 4.6  | -    | 117 | 94  | 340  | 0.05 | 2.82 | 604  | 1.80 | 1375.0 ± 9.0                      | 681.7 ± 21.5                      | 2056.7 ± 66.2            |
| DB-DSW1   | 1.87             | 4.49      | 7.77 | 6431       | 544  | 2343            | 0.9  | 0.10            | 0.08            | 10.5 | 0.03 | 153 | 139 | 426  | 0.04 | 3.56 | 845  | 2.12 | 333.0 ± 2.2                       | 131.6 ± 5.0                       | 464.6 ± 18.0             |
| DB-W1     | 1.02             | 3.18      | 7.62 | 6420       | 600  | 2600            | 1.0  | 0.14            | 0.07            | 9.0  | -    | 153 | 137 | 421  | 0.03 | 3.66 | 852  | 2.16 | 724.7 ± 4.9                       | 162.0 ± 8.3                       | 886.7 ± 45.8             |
| DC-100m   | 41.10            | 0.61      | 8.11 | 2291       | 176  | 465             | 0.2  | 0.11            | -               | 3.9  | -    | 26  | 39  | 86   | 0.14 | 0.96 | 264  | 0.42 | 442.0 ± 4.8                       | 237.3 ± 11.1                      | 679.3 ± 32.7             |
| DC-D      | 40.44            | 0.49      | 7.90 | 2266       | 174  | 458             | 0.2  | 0.08            | -               | 5.4  | -    | 26  | 39  | 90   | 0.14 | 0.93 | 265  | 0.41 | 451.2 ± 3.9                       | 197.5 ± 9.9                       | 648.6 ± 32.9             |
| DC-DSW1   | 25.25            | 1.85      | 8.36 | 2074       | NC   | NC              | NC   | NC              | NC              | NC   | NC   | NC  | NC  | NC   | NC   | NC   | NC   | NC   | 407.0 ± 2.4                       | 154.7 ± 5.3                       | 561.6 ± 19.4             |
| DC-DSW2   | 2.42             | 3.21      | 7.81 | 1987       | 186  | 593             | 0.2  | 3.41            | -               | 3.2  | -    | 28  | 42  | 63   | 0.12 | 1.04 | 293  | 0.48 | 139.1 ± 0.9                       | 106.3 ± 2.7                       | 245.4 ± 6.4              |
| DC-PLAYA  | 11.80            | 2.22      | 7.72 | 2090       | 182  | 606             | 0.2  | 0.01            | -               | 4.9  | 0.21 | 27  | 41  | 65   | 0.11 | 0.99 | 289  | 0.45 | 174.7 ± 1.0                       | 98.7 ± 2.7                        | 273.4 ± 7.6              |
| DC-USW1   | 29.76            | 1.70      | 8.40 | 2093       | NC   | NC              | NC   | NC              | NC              | NC   | NC   | NC  | NC  | NC   | NC   | NC   | NC   | NC   | 675.3 ± 4.3                       | 321.0 ± 10.1                      | 996.3 ± 32.1             |
| DC-USW2   | 16.48            | 1.59      | 7.73 | 1995       | 172  | 578             | 0.2  | 0.15            | -               | 2.5  | -    | 29  | 41  | 61   | 0.13 | 1.03 | 291  | 0.47 | 567.1 ± 1.9                       | 240.5 ± 4.3                       | 807.6 ± 14.8             |
| DC-W1     | 27.14            | 1.98      | 8.50 | 2083       | 179  | 472             | 0.2  | 0.12            | -               | 3.0  | -    | 30  | 40  | 57   | 0.11 | 1.28 | 272  | 0.51 | 550.3 ± 3.1                       | 275.1 ± 7.8                       | 825.4 ± 23.8             |
| DC-W2     | 15.67            | 1.42      | 7.76 | 1908       | 177  | 598             | 0.2  | 0.22            | -               | 4.7  | -    | 29  | 42  | 64   | 0.12 | 1.00 | 280  | 0.45 | 780.1 ± 2.2                       | 311.0 ± 5.3                       | 1091.1 ± 18.8            |

[-] below detection limits

NC indicates water sample not collected for DC-USW1 and DC-DSW1

**Table S3.** Total carbon, inorganic carbon and organic carbon results (%) for sediment grab samples.

| Site Name   | TC (%) | TIC (%) | TOC (%) |
|-------------|--------|---------|---------|
| CSW         | 5.45   | 1.96    | 3.49    |
| Discharge A |        |         |         |
| DA-D        | 1.09   | 0.05    | 1.04    |
| DA-W1       | 12.88  | 12.17   | 0.71    |
| DA-DW1      | 2.44   | 1.88    | 0.56    |
| DA-W2       | 1.78   | 0.92    | 0.87    |
| DA-DW2      | 1.47   | 0.63    | 0.84    |
| Discharge B |        |         |         |
| DB-D        | 11.39  | 8.87    | 2.52    |
| DB-USW1     | 4.06   | 2.31    | 1.75    |
| DB-W1       | 7.62   | 4.93    | 2.69    |
| DB-DSW1     | 3.72   | 3.27    | 0.45    |
| Discharge C |        |         |         |
| DC-D        | 9.20   | 8.11    | 1.09    |
| DC-100m     | 12.32  | 11.46   | 0.86    |
| DC-UPW1     | 11.16  | 10.79   | 0.37    |
| DC-W1       | 7.01   | 5.05    | 1.96    |
| DC-DSW1     | 0.53   | 0.11    | 0.42    |
| DC-USW2     | 3.97   | 0.33    | 3.64    |
| DC-W2       | 4.22   | 0.37    | 3.85    |
| DC-DSW2     | 1.11   | 0.92    | 0.19    |
| DC-PLAYA    | 2.32   | 0.57    | 1.75    |



Table S5. Leachate concentrations ( $\mu\text{g/g}$ ) from sediment core leaching experiment normalized for both the volume of leachate recovered and mass of sample residue leached. Leachate solution blanks were also measured and reported as mg/L. Detection limits were also included at the bottom of the table for each element. [-] denote below detection limits. [NM] denotes not measured.

| Sample Name       | Leachate Solution                                                 | Al     | Ba    | Ca     | Fe     | K   | Mg   | Mn   | Na     | P       | S     | Si   | Sr     | Ti  | pH    |
|-------------------|-------------------------------------------------------------------|--------|-------|--------|--------|-----|------|------|--------|---------|-------|------|--------|-----|-------|
| DC-W1 3-5 cm      | H <sub>2</sub> O                                                  | -      | 4.7   | 736    | -      | 213 | 154  | 0.8  | 394    | 0.4     | 1663  | 29   | 34.7   | -   | 8.17  |
|                   | NH <sub>4</sub> OAc                                               | -      | 50.5  | 5954   | -      | 165 | 380  | 16.0 | 61     | 1.7     | 217   | 23   | 184.4  | -   | 8.27  |
|                   | Na <sub>4</sub> P <sub>2</sub> O <sub>7</sub> .10H <sub>2</sub> O | 19.4   | 11.9  | 851    | 445.0  | 50  | 273  | 12.3 | 115005 | 57562.5 | 457   | 118  | 246.7  | 2.8 | 10.44 |
|                   | HOAc                                                              | 1.7    | 27.1  | 94653  | -      | 106 | 2919 | 39.2 | 31944  | 466.5   | 4199  | 381  | 2177.1 | -   | 4.54  |
|                   | HCl                                                               | 0.5    | 4.7   | 24468  | -      | 33  | 563  | 2.6  | 2362   | 428.1   | 843   | 144  | 516.9  | -   | 4.32  |
| DC-W1 13-15 cm    | H <sub>2</sub> O                                                  | -      | 3.6   | 728    | -      | 113 | 95   | 0.7  | 220    | 0.3     | 1037  | 22   | 26.8   | -   | 7.98  |
|                   | NH <sub>4</sub> OAc                                               | -      | 25.0  | 5342   | -      | 74  | 186  | 11.5 | 35     | 2.2     | 232   | 16   | 131.8  | -   | 8.30  |
|                   | Na <sub>4</sub> P <sub>2</sub> O <sub>7</sub> .10H <sub>2</sub> O | 7.2    | 11.0  | 690    | 153.4  | 32  | 229  | 4.1  | 112384 | 52266.3 | 590   | 54   | 257.7  | 1.5 | 10.63 |
|                   | HOAc                                                              | 1.4    | 21.8  | 79648  | -      | 68  | 2336 | 16.1 | 31487  | 457.4   | 4081  | 176  | 1706.1 | -   | 4.46  |
|                   | HCl                                                               | 0.6    | 4.1   | 23588  | -      | 21  | 505  | 1.2  | 1232   | 818.6   | 822   | 78   | 489.8  | -   | 4.34  |
| DC-W1 23-25 cm    | H <sub>2</sub> O                                                  | -      | 3.4   | 772    | -      | 101 | 90   | 0.8  | 182    | 0.2     | 1160  | 23   | 26.1   | -   | 8.03  |
|                   | NH <sub>4</sub> OAc                                               | -      | 21.5  | 5144   | -      | 61  | 153  | 6.1  | 30     | 2.3     | 271   | 14   | 109.1  | -   | 8.33  |
|                   | Na <sub>4</sub> P <sub>2</sub> O <sub>7</sub> .10H <sub>2</sub> O | 9.1    | 13.0  | 470    | 73.8   | 46  | 229  | 2.7  | 113473 | 51333.3 | 1044  | 48   | 320.3  | 1.5 | 10.83 |
|                   | HOAc                                                              | 3.5    | 111.4 | 97657  | 6.1    | 84  | 3578 | 34.8 | 35334  | 339.6   | 5083  | 135  | 3093.1 | -   | 4.57  |
|                   | HCl                                                               | 2.2    | 5.4   | 27993  | 1.6    | 18  | 340  | 7.6  | 975    | 10933.9 | 835   | 123  | 263.1  | -   | 3.78  |
| DC-W2 2-4 cm      | H <sub>2</sub> O                                                  | -      | 2.5   | 2029   | -      | 266 | 368  | 7.7  | 386    | 0.5     | 2283  | 54   | 55.1   | -   | 7.40  |
|                   | NH <sub>4</sub> OAc                                               | -      | 61.2  | 2899   | -      | 256 | 352  | 18.0 | 51     | 2.5     | 173   | 35   | 88.7   | -   | 8.06  |
|                   | Na <sub>4</sub> P <sub>2</sub> O <sub>7</sub> .10H <sub>2</sub> O | 106.0  | 15.1  | 606    | 1303.7 | 101 | 153  | 29.6 | 126543 | 69059.3 | 211   | 456  | 9.5    | 8.7 | 9.70  |
|                   | HOAc                                                              | 74.6   | 7.2   | 2134   | 96.4   | 70  | 1109 | 11.5 | 5357   | 455.3   | 70    | 403  | 5.9    | -   | 3.32  |
|                   | HCl                                                               | 473.9  | 28.2  | 1583   | 593.4  | 116 | 697  | 9.7  | 227    | 535.0   | 68    | 634  | 6.0    | -   | 1.94  |
| DC-W2 10-12 cm    | H <sub>2</sub> O                                                  | -      | 3.6   | 635    | -      | 232 | 163  | 1.2  | 470    | 0.7     | 1403  | 38   | 28.2   | -   | 7.91  |
|                   | NH <sub>4</sub> OAc                                               | -      | 68.1  | 5422   | -      | 293 | 443  | 25.2 | 81     | 1.7     | 560   | 37   | 145.9  | -   | 8.23  |
|                   | Na <sub>4</sub> P <sub>2</sub> O <sub>7</sub> .10H <sub>2</sub> O | 77.8   | 9.6   | 1317   | 1913.6 | 108 | 115  | 36.5 | 133613 | 69289.7 | 348   | 276  | 13.9   | 9.6 | 9.76  |
|                   | HOAc                                                              | 61.8   | 6.7   | 3975   | 86.9   | 87  | 1598 | 29.5 | 4319   | 373.3   | 146   | 326  | 9.8    | -   | 3.35  |
|                   | HCl                                                               | 742.5  | 37.7  | 1848   | 1018.3 | 185 | 829  | 14.7 | 186    | 614.3   | 110   | 1188 | 7.2    | 0.5 | 1.87  |
| DC-W2 16-18 cm    | H <sub>2</sub> O                                                  | 0.3    | 2.0   | 354    | 0.4    | 204 | 88   | 1.0  | 412    | 1.0     | 460   | 38   | 14.8   | -   | 8.16  |
|                   | NH <sub>4</sub> OAc                                               | -      | 63.5  | 5297   | -      | 306 | 392  | 35.4 | 81     | 2.4     | 300   | 40   | 132.0  | -   | 8.30  |
|                   | Na <sub>4</sub> P <sub>2</sub> O <sub>7</sub> .10H <sub>2</sub> O | 65.9   | 7.1   | 1255   | 1040.9 | 104 | 119  | 40.8 | 131938 | 70384.5 | 232   | 281  | 10.4   | 6.3 | 9.72  |
|                   | HOAc                                                              | 50.7   | 6.4   | 3917   | 138.7  | 88  | 1591 | 28.7 | 3812   | 202.5   | 143   | 367  | 8.5    | -   | 3.32  |
|                   | HCl                                                               | 693.7  | 32.7  | 1629   | 1075.3 | 169 | 665  | 13.1 | 182    | 545.0   | 92    | 1125 | 6.3    | 0.4 | 1.86  |
| DC-PLAYA 2-4 cm   | H <sub>2</sub> O                                                  | -      | 2.4   | 714    | -      | 262 | 146  | 2.3  | 417    | 1.6     | 1248  | 55   | 20.0   | -   | 7.85  |
|                   | NH <sub>4</sub> OAc                                               | 0.6    | 66.1  | 6245   | 0.9    | 382 | 393  | 43.9 | 80     | 2.8     | 206   | 45   | 106.5  | -   | 8.25  |
|                   | Na <sub>4</sub> P <sub>2</sub> O <sub>7</sub> .10H <sub>2</sub> O | 70.8   | 9.6   | 1706   | 1593.0 | 132 | 78   | 89.1 | 140592 | 72639.1 | 125   | 251  | 17.4   | 4.5 | 9.83  |
|                   | HOAc                                                              | 67.1   | 4.4   | 2269   | 115.5  | 113 | 733  | 26.2 | 4777   | 322.2   | 63    | 558  | 8.0    | -   | 3.32  |
|                   | HCl                                                               | 795.0  | 21.8  | 1374   | 514.3  | 206 | 578  | 15.9 | 192    | 503.7   | 45    | 1264 | 6.4    | -   | 1.94  |
| DC-PLAYA 8-10 cm  | H <sub>2</sub> O                                                  | -      | 2.3   | 639    | -      | 237 | 111  | 0.2  | 404    | 1.3     | 914   | 52   | 14.6   | -   | 7.92  |
|                   | NH <sub>4</sub> OAc                                               | -      | 70.3  | 6056   | 0.5    | 416 | 382  | 50.7 | 78     | 2.4     | 170   | 43   | 85.3   | -   | 8.25  |
|                   | Na <sub>4</sub> P <sub>2</sub> O <sub>7</sub> .10H <sub>2</sub> O | 187.3  | 9.2   | 1433   | 1456.7 | 206 | 118  | 84.3 | 148441 | 67889.4 | 97    | 601  | 9.1    | 5.3 | 9.77  |
|                   | HOAc                                                              | 86.3   | 3.8   | 1693   | 73.4   | 100 | 559  | 23.5 | 3547   | 396.5   | 52    | 489  | 5.2    | -   | 3.22  |
|                   | HCl                                                               | 799.4  | 18.3  | 1313   | 514.4  | 213 | 640  | 17.0 | 179    | 461.2   | 42    | 1214 | 5.2    | -   | 1.86  |
| DC-PLAYA 14-16 cm | H <sub>2</sub> O                                                  | -      | 1.2   | 2132   | -      | 232 | 143  | 2.5  | 377    | 0.6     | 2073  | 33   | 20.3   | -   | 7.71  |
|                   | NH <sub>4</sub> OAc                                               | -      | 57.2  | 5522   | -      | 386 | 230  | 39.0 | 60     | 1.7     | 150   | 27   | 45.7   | -   | 8.21  |
|                   | Na <sub>4</sub> P <sub>2</sub> O <sub>7</sub> .10H <sub>2</sub> O | 85.7   | 10.2  | 921    | 420.5  | 133 | 65   | 66.3 | 130137 | 72946.9 | 59    | 191  | 6.6    | 2.9 | 9.83  |
|                   | HOAc                                                              | 247.8  | 2.0   | 1943   | 88.9   | 136 | 526  | 30.5 | 7126   | 1655.8  | 53    | 1073 | 4.6    | -   | 3.43  |
|                   | HCl                                                               | 1235.7 | 21.6  | 1769   | 439.8  | 328 | 788  | 30.6 | 408    | 952.5   | 51    | 2206 | 5.9    | 0.4 | 1.82  |
| DA-W1 2-4 cm      | H <sub>2</sub> O                                                  | 1.3    | 0.2   | 399    | -      | 86  | 48   | -    | 585    | 1.2     | 491   | 24   | 10.0   | -   | 8.68  |
|                   | NH <sub>4</sub> OAc                                               | -      | 1.9   | 5407   | 1.4    | 23  | 53   | 2.6  | 84     | 12.6    | 223   | 9    | 69.8   | -   | 8.34  |
|                   | Na <sub>4</sub> P <sub>2</sub> O <sub>7</sub> .10H <sub>2</sub> O | 8.3    | 3.6   | 210    | 9.5    | 53  | 34   | -    | 97493  | 35500.8 | 1307  | 58   | 215.8  | -   | 10.96 |
|                   | HOAc                                                              | 2.8    | 36.1  | 115199 | 2.6    | 303 | 1630 | 29.2 | 47687  | 160.5   | 10606 | 44   | 2883.5 | -   | 4.85  |
|                   | HCl                                                               | 0.8    | 5.1   | 16157  | 0.4    | 23  | 155  | 0.9  | 1165   | 179.0   | 882   | 54   | 264.9  | -   | 4.50  |

Table S5. Leachate concentrations ( $\mu\text{g/g}$ ) from sediment core leaching experiment normalized for both the volume of leachate recovered and mass of sample residue leached. Leachate solution blanks were also measured and reported as mg/L. Detection limits were also included at the bottom of the table for each element. [-] denote below detection limits. [NM] denotes not measured.

| Sample Name      | Leachate Solution                                                 | Al     | Ba     | Ca     | Fe     | K     | Mg    | Mn     | Na     | P       | S     | Si   | Sr     | Ti     | pH    |
|------------------|-------------------------------------------------------------------|--------|--------|--------|--------|-------|-------|--------|--------|---------|-------|------|--------|--------|-------|
| DA-W1 8-10 cm    | H <sub>2</sub> O                                                  | 0.3    | 0.9    | 461    | -      | 121   | 48    | -      | 488    | 0.2     | 608   | 15   | 12.0   | -      | 8.43  |
|                  | NH <sub>4</sub> OAc                                               | -      | 6.4    | 5568   | 1.2    | 40    | 78    | 4.1    | 51     | 3.7     | 246   | 9    | 79.6   | -      | 8.38  |
|                  | Na <sub>4</sub> P <sub>2</sub> O <sub>7</sub> ·10H <sub>2</sub> O | 13.7   | 3.2    | 309    | 30.6   | 73    | 73    | 0.6    | 99889  | 39122.5 | 1243  | 45   | 210.8  | 0.8    | 11.01 |
|                  | HOAc                                                              | 3.1    | 23.6   | 105237 | 3.3    | 236   | 2206  | 12.4   | 39672  | 203.3   | 9279  | 75   | 2248.5 | -      | 4.82  |
|                  | HCl                                                               | 0.8    | 4.0    | 16166  | 0.7    | 24    | 228   | 0.8    | 1176   | 266.2   | 903   | 44   | 250.3  | -      | 4.61  |
| DA-W1 12-14 cm   | H <sub>2</sub> O                                                  | 0.4    | 1.3    | 289    | -      | 452   | 50    | 0.2    | 725    | 0.7     | 790   | 39   | 9.1    | -      | 8.26  |
|                  | NH <sub>4</sub> OAc                                               | -      | 53.8   | 4900   | -      | 619   | 342   | 12.0   | 130    | 1.4     | 195   | 36   | 105.9  | -      | 8.30  |
|                  | Na <sub>4</sub> P <sub>2</sub> O <sub>7</sub> ·10H <sub>2</sub> O | 89.0   | 9.6    | 737    | 202.3  | 187   | 81    | 13.3   | 133710 | 64653.9 | 235   | 298  | 40.7   | 9.6    | 9.96  |
|                  | HOAc                                                              | 528.9  | 1.2    | 5056   | 203.8  | 167   | 319   | 27.5   | 8987   | 6434.9  | 221   | 1024 | 32.2   | 3.5    | 3.32  |
|                  | HCl                                                               | 760.8  | 15.9   | 2113   | 620.4  | 265   | 628   | 22.5   | 358    | 813.4   | 106   | 1555 | 16.7   | 1.0    | 1.88  |
| CSW 2-4 cm       | H <sub>2</sub> O                                                  | -      | 1.8    | 600    | -      | 120   | 513   | 2.5    | 1051   | 1.2     | 3649  | 61   | 13.1   | -      | 8.22  |
|                  | NH <sub>4</sub> OAc                                               | -      | 48.9   | 6311   | -      | 296   | 1617  | 68.4   | 206    | 2.4     | 306   | 61   | 90.5   | -      | 8.34  |
|                  | Na <sub>4</sub> P <sub>2</sub> O <sub>7</sub> ·10H <sub>2</sub> O | 286.0  | 7.0    | 1365   | 1292.4 | 213   | 664   | 102.5  | 128374 | 64764.0 | 323   | 1126 | 59.0   | 14.6   | 10.21 |
|                  | HOAc                                                              | 440.7  | 1.0    | 9028   | 210.9  | 145   | 1396  | 123.4  | 15885  | 11794.4 | 256   | 1431 | 30.9   | 1.9    | 3.51  |
|                  | HCl                                                               | 1140.1 | 19.7   | 5499   | 555.7  | 303   | 1831  | 78.3   | 654    | 2187.0  | 172   | 2315 | 22.8   | 0.8    | 1.93  |
| CSW 14-16 cm     | H <sub>2</sub> O                                                  | 0.4    | 0.9    | 188    | 0.3    | 62    | 132   | 0.6    | 1705   | 2.0     | 1285  | 44   | 4.7    | -      | 8.89  |
|                  | NH <sub>4</sub> OAc                                               | -      | 59.1   | 3452   | -      | 287   | 1170  | 64.1   | 336    | 1.5     | 117   | 34   | 59.3   | -      | 8.21  |
|                  | Na <sub>4</sub> P <sub>2</sub> O <sub>7</sub> ·10H <sub>2</sub> O | 283.7  | 10.0   | 1012   | 788.1  | 196   | 270   | 123.7  | 131792 | 67389.3 | 74    | 920  | 7.8    | 7.3    | 9.75  |
|                  | HOAc                                                              | 115.8  | 3.2    | 1407   | 56.2   | 92    | 735   | 30.0   | 4183   | 512.5   | 41    | 832  | 3.9    | -      | 3.15  |
|                  | HCl                                                               | 1154.5 | 9.6    | 1435   | 440.8  | 210   | 786   | 23.3   | 236    | 898.6   | 45    | 1747 | 5.1    | 0.5    | 1.89  |
| CSW 26-28 cm     | H <sub>2</sub> O                                                  | -      | 0.6    | 449    | -      | 44    | 177   | 1.0    | 2155   | 1.2     | 2090  | 42   | 6.3    | -      | 8.71  |
|                  | NH <sub>4</sub> OAc                                               | -      | 54.0   | 3697   | -      | 247   | 818   | 60.7   | 348    | 1.2     | 105   | 36   | 39.8   | -      | 8.17  |
|                  | Na <sub>4</sub> P <sub>2</sub> O <sub>7</sub> ·10H <sub>2</sub> O | 238.8  | 6.1    | 813    | 360.2  | 141   | 178   | 107.1  | 135771 | 68626.9 | 46    | 672  | 3.8    | 4.8    | 9.88  |
|                  | HOAc                                                              | 199.7  | 2.0    | 2392   | 39.7   | 88    | 1122  | 41.3   | 6366   | 970.7   | 63    | 957  | 3.5    | -      | 3.20  |
|                  | HCl                                                               | 1273.7 | 8.7    | 1741   | 412.4  | 208   | 931   | 32.1   | 296    | 1150.3  | 50    | 1893 | 4.5    | 0.5    | 1.89  |
| Solution Blanks  | H <sub>2</sub> O                                                  | <0.005 | <0.005 | <0.01  | 0.01   | <0.01 | <0.01 | <0.005 | <0.01  | <0.01   | <0.02 | 0.03 | <0.005 | <0.005 | 7.00  |
|                  | NH <sub>4</sub> OAc                                               | <0.005 | <0.005 | 0.01   | <0.005 | 0.02  | 0.01  | 0.01   | 0.05   | 0.04    | <0.02 | 0.02 | <0.005 | <0.005 | 8.00  |
|                  | Na <sub>4</sub> P <sub>2</sub> O <sub>7</sub> ·10H <sub>2</sub> O | <0.005 | <0.005 | 0.07   | 0.11   | 0.15  | 0.01  | <0.005 | NM     | NM      | 0.05  | 0.14 | <0.005 | <0.005 | 10.75 |
|                  | HOAc                                                              | <0.005 | <0.005 | <0.01  | <0.005 | 0.01  | <0.01 | <0.005 | 0.02   | 0.08    | <0.02 | 0.03 | <0.005 | <0.005 | 2.67  |
|                  | HCl                                                               | <0.005 | <0.005 | 0.01   | 0.01   | <0.01 | <0.01 | 0.01   | 0.02   | 0.02    | <0.02 | 0.01 | <0.005 | <0.005 | 1.74  |
| Detection Limits |                                                                   | <0.005 | <0.005 | <0.01  | 0.01   | <0.01 | <0.01 | <0.005 | <0.01  | <0.01   | <0.02 | 0.03 | <0.005 | <0.005 |       |

Table S6. XRD results for select sediment samples including quantification of minerals for DC-W1 3-5 cm, DC-W2 10-12 cm, and DC-W2 16-18 cm.

| Sample                 | Mineral 1     | Mineral 2        | Mineral 3          | Mineral 4            | Mineral 5       | Mineral 6                | Mineral 7       | Mineral 8                | Mineral 9             | Mineral 10     | Mineral 11                         | Quantified |
|------------------------|---------------|------------------|--------------------|----------------------|-----------------|--------------------------|-----------------|--------------------------|-----------------------|----------------|------------------------------------|------------|
| DC-W1 3-5 cm           | calcite (75%) | quartz (11%)     | pellyite (6%)      | montmorillonite (5%) | halloysite (2%) | dickite (<1%)            | celestite (<1%) | anorthite (<1%)          | -                     | -              | -                                  | yes        |
| DC-W1 13-15 cm         | quartz        | calcite          | montmorillonite    | -                    | -               | -                        | -               | -                        | -                     | -              | -                                  | no         |
| DC-W1 13-15 cm residue | quartz        | calcite          | orthoclase         | anorthite            | montmorillonite | magnetite                | -               | -                        | -                     | -              | -                                  | no         |
| DC-W1 23-25 cm         | quartz        | calcite          | montmorillonite    | barite (trace)       | -               | -                        | -               | -                        | -                     | -              | -                                  | no         |
| DC-W2 2-4 cm           | quartz        | montmorillonite  | halloysite         | celestite (trace)    | gypsum (trace)  | -                        | -               | -                        | -                     | -              | -                                  | no         |
| DC-W2 10-12 cm         | quartz (48%)  | albite (15%)     | illite (13%)       | microcline (9%)      | dolomite (5%)   | calcite (4%)             | kaolinite (3%)  | chlorite-serpentine (1%) | montmorillonite (<1%) | barite (<0.5%) | mangano-mangani ungaretite (<0.5%) | yes        |
| DC-W2 10-12 cm residue | quartz        | montmorillonite  | illite             | albite               | barite (trace)  | -                        | -               | -                        | -                     | -              | -                                  | no         |
| DC-W2 16-18 cm         | quartz (50%)  | halloysite (11%) | johannsenite (11%) | albite (7%)          | orthoclase (5%) | chlorite-serpentine (5%) | anorthite (4%)  | dolomite (4%)            | montmorillonite (2%)  | barite (<0.5%) | -                                  | yes        |



**Table S7:** Vegetation samples (dry weight) analyzed for  $^{226}\text{Ra}$  uptake and their corresponding calculated concentration ratio ( $C_r$ ). Exchangeable soil  $^{226}\text{Ra}$  was determined as the percent  $^{226}\text{Ra}$  lost during sediment leaching step 2. Exchangeable-normalized  $^{226}\text{Ra}$   $C_r$  was calculated by dividing the plant  $^{226}\text{Ra}$  activity by the exchangeable  $^{226}\text{Ra}$  fraction of the sediment.

| Sample                    | Plant $^{226}\text{Ra}$ (Bq/kg) | $\pm$ error (Bq/kg) | $^{226}\text{Ra}$ $C_r^*$ | Exchangeable sediment $^{226}\text{Ra}$ (%) | Exchangeable $^{226}\text{Ra}$ $C_r$ |
|---------------------------|---------------------------------|---------------------|---------------------------|---------------------------------------------|--------------------------------------|
| DA-W1 cattail leaves      | 79.44                           | 4.64                | 0.05                      | 11                                          | 0.46                                 |
| DA-W1 cattail roots       | 53.08                           | 4.97                | 0.03                      | 11                                          | 0.31                                 |
| DB-D grass leaves         | 523.08                          | 20.14               | 0.38                      | 9**                                         | 4.29                                 |
| DB-D grass roots          | 880.53                          | 30.20               | 0.64                      | 9**                                         | 7.22                                 |
| DB-100m sedge seeds       | 473.72                          | 22.64               | 0.17                      | -                                           | -                                    |
| DB-100m sedge stems       | 293.56                          | 11.98               | 0.11                      | -                                           | -                                    |
| DB-100m sedge roots       | 75.03                           | 4.37                | 0.03                      | -                                           | -                                    |
| DB-W1 cattail leaves      | 148.91                          | 7.21                | 0.21                      | 36**                                        | 2.32                                 |
| DB-W1 cattail roots       | 32.33                           | 2.68                | 0.04                      | 36**                                        | 0.12                                 |
| DC-D grass roots + leaves | 76.40                           | 5.15                | 0.17                      | 11**                                        | 1.51                                 |
| DC-100m grass leaves      | 82.93                           | 3.62                | 0.19                      | -                                           | -                                    |
| DC-100m grass roots       | 167.11                          | 9.06                | 0.38                      | -                                           | -                                    |
| DC-W1 cattail leaves      | 40.75                           | 6.34                | 0.06                      | 22                                          | 0.26                                 |
| DC-W1 cattail roots       | 57.84                           | 14.26               | 0.08                      | 22                                          | 0.37                                 |
| DC-W2 cattail seeds       | 24.60                           | 5.59                | 0.06                      | 52                                          | 0.11                                 |
| DC-W2 cattail leaves      | 112.20                          | 6.59                | 0.26                      | 52                                          | 0.50                                 |
| DC-W2 cattail roots       | 129.55                          | 3.49                | 0.30                      | 52                                          | 0.58                                 |
| DC-PLAYA sedge stems      | 50.59                           | 2.68                | 0.39                      | 56                                          | 0.69                                 |
| DC-PLAYA sedge roots      | 66.90                           | 2.43                | 0.51                      | 56                                          | 0.92                                 |
| CSW cattail seeds         | BDL                             | BDL                 | -                         | 78                                          | -                                    |
| CSW cattail leaves        | 7.62                            | 1.42                | 0.13                      | 78                                          | 0.17                                 |
| CSW cattail roots         | 6.96                            | 0.51                | 0.12                      | 78                                          | 0.16                                 |

\*calculated using 5 cm sediment core section  $^{226}\text{Ra}$  activity, DB samples calculated using grab sediment sample

\*\*leaching data taken from McDevitt et al. (2019)

[-] indicates data not collected/calculated

BDL indicates below detection limits
